# Supplementary material
Source: MDPI journal article supplement (https://www.mdpi.com/2071-1050/10/3/630)
Supplement: s1 [file s1]

## Sheet: table S1
	Table S1. Land use inventory results and impact assessment results in case studies of agricultural LCA.
	No.	Country/ Region	Function Unit (FU)	Land use inventory analysis					Land use impact assessment					Remarks	References
				Inventory result		Unit1			Indicator		Impact result		Unit1
	1	Spain	Tomato, 1 ha	n.a.		-			Soil organic carbon depletion		7900		kg C·yr/FU	・Developing CFs can differentiate agricultural practices is mentioned as a future work.	[1]
				n.a.		-			Erosion		798		NPPD/FU
				n.a.		-			Biodiversity		6.4e-05		PLNE/FU
	2	UK	Energy crops, 1 ha	n.a.		-			Soil organic carbon		-65.3		t C·yr/FU	・The impact is estimated by primary data. ・The value of Miscanthus is illustrated here.	[2]
	3	Cuba	Cane sugar, 216 t/day	48.1		ha/FU			Ecosystem quality		35400		Point/FU	・CFs do not differentiate management practices.	[3]
	4	Italy	Beer, 1 L	n.a.		-			Ecosystem quality		8.5e-05		-/FU	・CFs do not differentiate management practices. ・Normalized value (dimensionless) is shown.	[4]
	5	USA	Ethanol, 1 t	0.4		ha/FU			Biodiversity		1.04		-/FU	・The impact is estimated by primary data. ・The value of ethanol from corn grains (10%) based on hemeroby method is illustrated here.	[5]
	6	Brazil	Soybean, 1 t	0.33		ha/FU			End-point impact		800		$/FU	・The value of Amazon region is illustrated here. ・End-point includes impact of biodiversity, erosion, water purification, groundwater recharge, soil organic carbon and climate regulation potential.	[6]
	7	Finland	Beer, 0.33 L	0.2		m2･year/FU			Soil organic carbon Biodiversity		-		-	・Impact results are shown as breakdown of impact by land use type, not an absolute value.	[7]
	8	UK, Germany	Margarine, 0.5 kg	2.4		m2･year/FU			Biodiversity damage potential Climate regulation potential Soil organic carbon depletion Erosion regulation potential Freshwater regulation potential Water purification potential		1.5 0.2 5.0 6.9 120.0 6.8		PDF/FU kg C/FU (transferred to air) kg C·yr/FU kg Soil/FU mm/year/FU cm/day/FU	・Results of UK are illustrated here. ・CFs do not differentiate management practices. ・Developing CFs can differentiate agricultural practices is mentioned as a furture chanllage.	[8]
	9	Sweden	Animal protein, 1 kg	41		m2/FU			Carbon flow change Groundwater recharge Water filtration capacity Soil loss Soil organic carbon depletion		3.1 5200 200 130 -40		kg C·yr/FU m3/FU m3/FU kg/FU kg ·yr/FU	・Results of protein prodocted from dairy milk in Västra Götaland are illustrated here.	[9]
	10	Denmark	Dry matter of the harvested biomasses, 1 t	852		m2/FU			Soil organic carbon depletion		0.06		t C/FU	・Results of biomass Alfalfa are illustrated here.	[10]
	11	Indonesia, Malaysia	Refined vegetable oil, 1 t	0.24		ha･year/FU			Biodiversity		6.64		wS100/FU	・Results of palm oil are illustrated here.	[11]
	12	Switzerland	Multi-crop, 1t	(organic) 1.4		m2･year/FU			Biodiversity Soil quality		8.0 slightly positive		% -	・Impacts of biodiversity and soil quality are assessed per area of land use (not per FU). ・Value of biodiversity are shown as a positive impact.	[12]
				(conventional) 1.1					Biodiversity Soil quality		7.7 slightly positive		% -
	13	Italy	Olive, 1ha	(organic) n.a.		-			Ecosystem quality		2.97		Point/FU	・CFs do not differentiate management practices. ・Lack of assessment of soil quality is mentioned as a limitation.	[13]
				(conventional) n.a.							2.57
	14	Italy	Milk (fat and protein Corrected), 1kg	(less insentive) 3.7		m2/FU			Biodiversity		2.4		Damage Score/FU	･CFs differentiate agricultural land use on intensity level.	[14]
				(insentive) 1.0							0.75
	15	Finland	Cereal seeds, 1 t	(organic) 0.14		ha/FU			Erosion Organic matter Compaction		0.7 -0.4 55		t/FU t/FU m3/FU	・Impacts are estimated based on process model using primary data.	[15]
				(conventional) 0.08		ha/FU			Erosion Organic matter Compaction		0.3 0.2 150		t/FU t/FU m3/FU
	16	Greece	Lettuce, 1 t	(organic) n.a.		-			Ecosystem quality		30		Point/FU	・CFs do not differentiate management practices.	[16]
				(conventional) n.a.							12.5
	17	Sweden, Russia, Indonesia, China	textile fibre, 1 t	(low intensive) 72		m2/FU			Biodiversity		3.5		wS100/FU	･CFs differentiate land use on intensity level.	[17]
				(high intensive) 72							5.3			・Results of cotton farm in China are illustrated here.
	18	Denmark	Milk (energy corrected), 1kg	(organic) 1.6-1.9		m2/FU			Biodiversity		0.2-0.3		Damage Score/FU	･CFs differentiate agricultural land use on intensity level.	[18]
				(conventional) 1.1-1.4							0.9-1.2
	19	Sweden	Milk (energy corrected), 1kg	(organic) 3.0		m2・year/FU			Biodiversity		0.42		PDF/FU	･CFs differentiate agricultural land use on intensity level.	[19]
				(conventional) 1.6							0.89
	1FU, functional unit; DS, damage score; PDF, potentially disappeared fraction; n.a., data not available; NPPD, Net primary production depletion; PLNE, potentially lost nonendemic species; wS100, weighted species richness in a standard area (100 m2).
	References
	1. Anton, A.; Torrellas, M.; Núñez, M.; Sevigné, E.; Amores, M.J.; Muñoz, P.; Montero, J.I. Improvement of Agricultural Life Cycle Assessment Studies through Spatial Differentiation and New Impact Categories: Case Study on Greenhouse Tomato Production. Environ. Sci. Technol. 2014, 48, 9454−9462.
	2. Brandão, M.; Canals, L.M.; Clift, R. Soil organic carbon changes in the cultivation of energy crops: Implications for GHG balances and soil quality for use in LCA. Biomass Bioenergy 2011, 35, 2323–2336.
	3. Contreras, A.M.; Rosa, E.; Perez, M.; Van Langenhove, H.; Dewulf, J. Comparative Life Cycle Assessment of four alternatives for using by-products of cane sugar production. J. Clean. Prod. 2009, 17, 772–779.
	4. Cordella, M.; Tugnoli, A.; Spadoni, G.; Santarelli, F.; Zangrando, T. LCA of an Italian Lager Beer. Int. J. LCA 2008, 13, 133–139.
	5. Geyer, R.; Lindner, J.P.; Stoms, D.M.; Davis, F.W.; Wittstock, B. Coupling LCA and GIS for biodiversity assessments of land use: Part 2 Impact assessment. Int. J. Life Cycle Assess. 2010, 15, 692–703.
	6. Lathuilliere, M.J.; Miranda, E.J.; Bulle, C.; Couto, E.G.; Johnson, M.S. Land occupation and transformation impacts of soybean production in Southern Amazonia, Brazil. J. Clean. Prod. 2017, 149, 680–689.
	7. Mattila, T.; Helin, T.; Antikainen, R. Land use indicators in life cycle assessment-A case study on beer production. Int. J. Life Cycle Assess. 2012, 17, 277–286.
	8. Canals, L.M.; Rigarlsford, G.; Sim, S. Land use impact assessment of margarine. Int. J. Life Cycle Assess. 2013, 18, 1265–1277.
	9. Nordborg, M.; Sasu-Boakye, Y.; Cederberg, C.; Berndes, G. Challenges in developing regionalized characterization factors in land use impact assessment: Impacts on ecosystem services in case studies of animal protein production in Sweden. Int. J. Life Cycle Assess. 2017, 22, 328–345.
	10. Parajuli, R.; Knudsen, M.T.; Djomo, S.N.; Corona, A.; Birkved, M.; Dalgaard, T. Environmental life cycle assessment of producing willow, alfalfa and straw from spring barley as feedstocks for bioenergy or biorefinery systems. Sci. Total Environ. 2017, 586, 226–240.
	11. Schmidt, J.H. Comparative life cycle assessment of rapeseed oil and palm oil. Int. J. Life Cycle Assess. 2010, 15, 183–197.
	12. Nemecek, T.; Dubois, D.; Huguenin-Elie, O.; Gaillard, G. Life cycle assessment of Swiss farming systems: I. Integrated and organic farming. Agric. Syst. 2011, 104, 217–232.
	13. Mohamad, R.S.; Verrastro, V.; Cardone, G.; Bteich, M.R.; Favia, M.; Moretti, M.; Roma, R. Optimization of organic and conventional olive agricultural practices from a Life Cycle Assessment and Life Cycle Costing perspectives. J. Clean. Prod. 2014, 70, 78–89.
	14. Battini, F.; Agostini, A.; Tabaglio, V.; Amaducci, S. Environmental impacts of different dairy farming systems in the PoValley. J. Clean. Prod. 2016, 112, 91–102.
	15. Joensuu, K.; Saarinen, M. Applying soil quality indicators in the context of life cycle assessment in a Finnish case study. Int. J. Life Cycle Assess. 2017, 22, 1339–1353.
	16. Foteinis, S.; Chatzisymeon, E. Life cycle assessment of organic versus conventional agriculture. A case study of lettuce cultivation in Greece. J. Clean. Prod. 2016, 112, 2462–2471.
	17. Sandin, G.; Peters, GM.; Svanström, M. Moving down the cause-effect chain of water and land use impacts: An LCA case study of textile fibres. Resour. Conserv. Recycl. 2013, 73, 104–113.
	18. Guerci, M.; Knudsen, M.T.; Bava, L.; Zucali, M.; Schönbach, P.; Kristensen, T. Parameters affecting the environmental impact of a range of dairy farming systems in Denmark, Germany and Italy. J. Clean. Prod. 2013, 54, 133–141.
	19. Mueller, C.; de Baan, L.; Koellner, T. Comparing direct land use impacts on biodiversity of conventional and organic milk—Based on a Swedish case study. Int. J. Life Cycle Assess. 2014, 19, 52–68.
